# Supplementary material for: Alternate oscillations of Martian hydrogen and oxygen upper atmospheres during a major dust storm
Source: Springer Nature journal article supplement (doi:10.1038/s41467-022-34224-6), 2022-11-03
Supplement: 41467_2022_34224_MOESM1_ESM.pdf [file 41467_2022_34224_MOESM1_ESM.pdf]

1 **Supplementary Information for “Alternate oscillations of Martian hydrogen and oxygen**  
2 **upper atmospheres during a major dust storm”**

3

4 Kei Masunaga\*<sup>1</sup>, Naoki Terada<sup>2</sup>, Nao Yoshida<sup>2</sup>, Yuki Nakamura<sup>2,3</sup>, Takeshi Kuroda<sup>2,4</sup>, Kazuo  
5 Yoshioka<sup>5,6</sup>, Yudai Suzuki<sup>6</sup>, Hiromu Nakagawa<sup>2</sup>, Tomoki Kimura<sup>7</sup>, Fuminori Tsuchiya<sup>8</sup>, Go  
6 Murakami<sup>1</sup>, Atsushi Yamazaki<sup>1</sup>, and Ichiro Yoshikawa<sup>5,6</sup>

7

8 1. Institute of Space and Astronautical Science, Japan Aerospace Exploration Agency,  
9 Sagamihara, Japan

10 2. Department of Geophysics, Graduate School of Science, Tohoku University, Sendai, Japan

11 3. LATMOS, Sorbonne Université, Paris, France

12 4. Division for the Establishment of Frontier Sciences of Organization for Advanced Studies,  
13 Tohoku University, Sendai, Japan

14 5. Graduate School of Frontier Sciences, University of Tokyo, Kashiwa, Japan

15 6. Department of Earth and Planetary Science, Graduate School of Science, University of  
16 Tokyo, Tokyo, Japan

17 7. Faculty of Science, Tokyo University of Science, Tokyo, Japan

18 8. Planetary Plasma and Atmospheric Research Center, Graduate School of Science, Tohoku  
19 University, Sendai, Japan

20

21 Corresponding author: Kei Masunaga (masunaga.kei@jaxa.jp)

22

23

24  
25  
26  
27

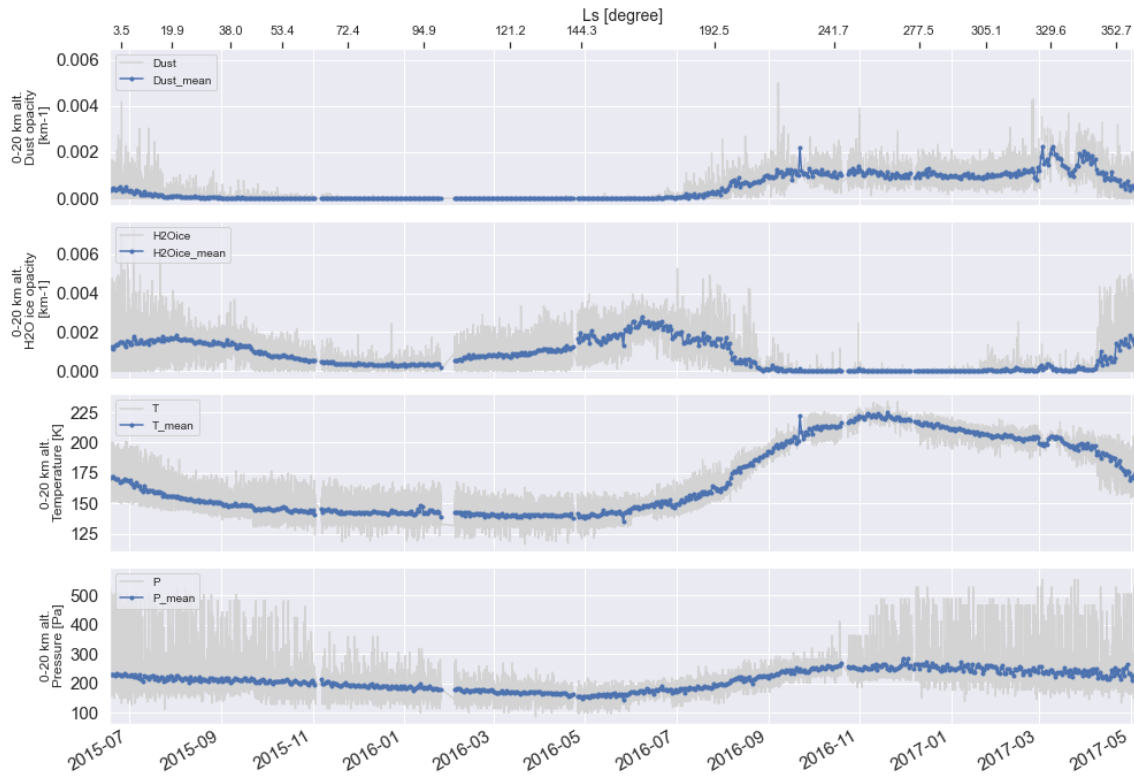

28

29 **Supplementary Fig. 1. Mars Climate Sounder (MCS) measurements throughout Mars Year**  
30 **33.**

31 MCS measurements of dust opacity, H<sub>2</sub>O ice opacity, air temperature, and air pressure observed  
32 at an altitude of 0–20 km at a local time of 11–13 h throughout Mars Year 33 (gray lines). The  
33 blue dots denote the average values of every Martian day, as shown in Figs. 1 and 2.

34

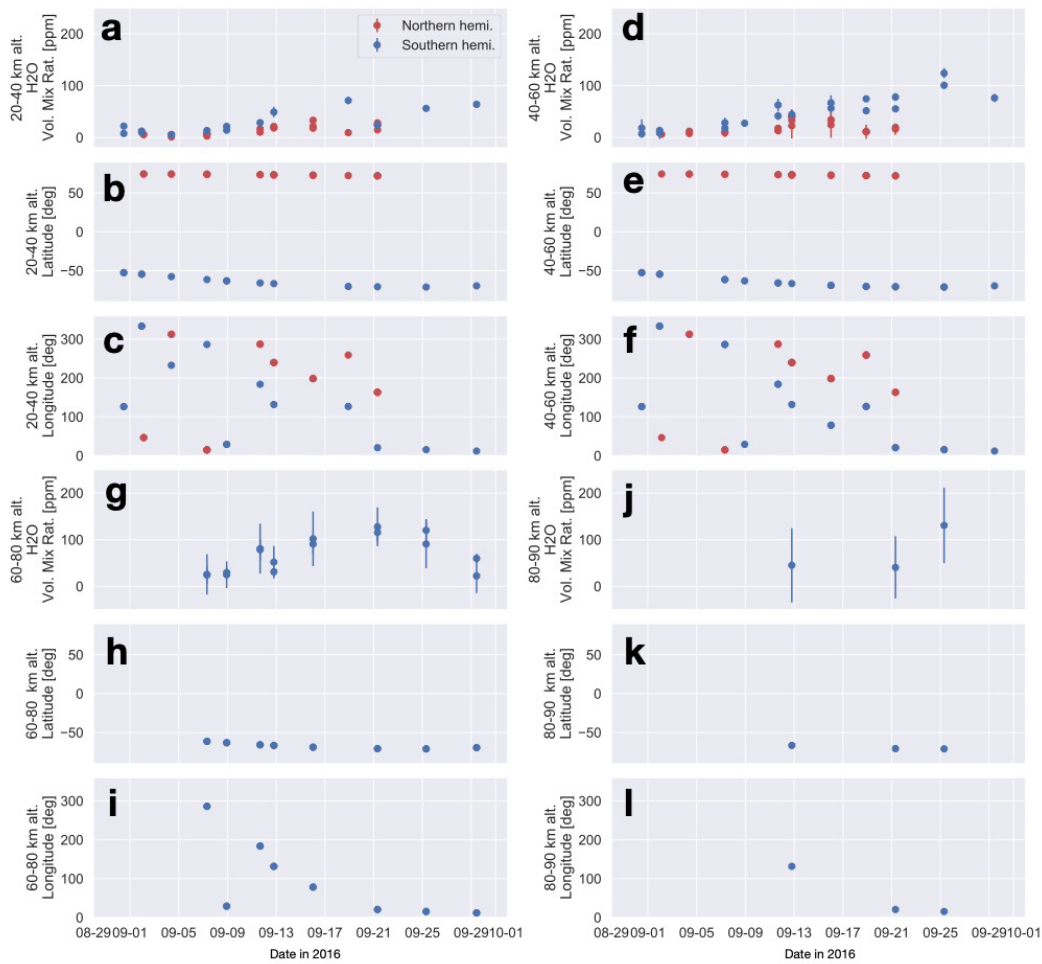

35

36 **Supplementary Fig. 2. Spectroscopy for the Investigation of the Characteristics of the**  
 37 **Atmosphere of Mars (SPICAM) measurements and its observation geometry.**

38 SPICAM measurements of water vapor mixing ratio in four altitude ranges (20–40 km, 40–60  
 39 km, 60–80 km, and 80–90 km) and their observed latitude and longitude. The two colors (red  
 40 and blue) denote measurements on the northern and southern hemispheres, respectively.

41

42

43

44

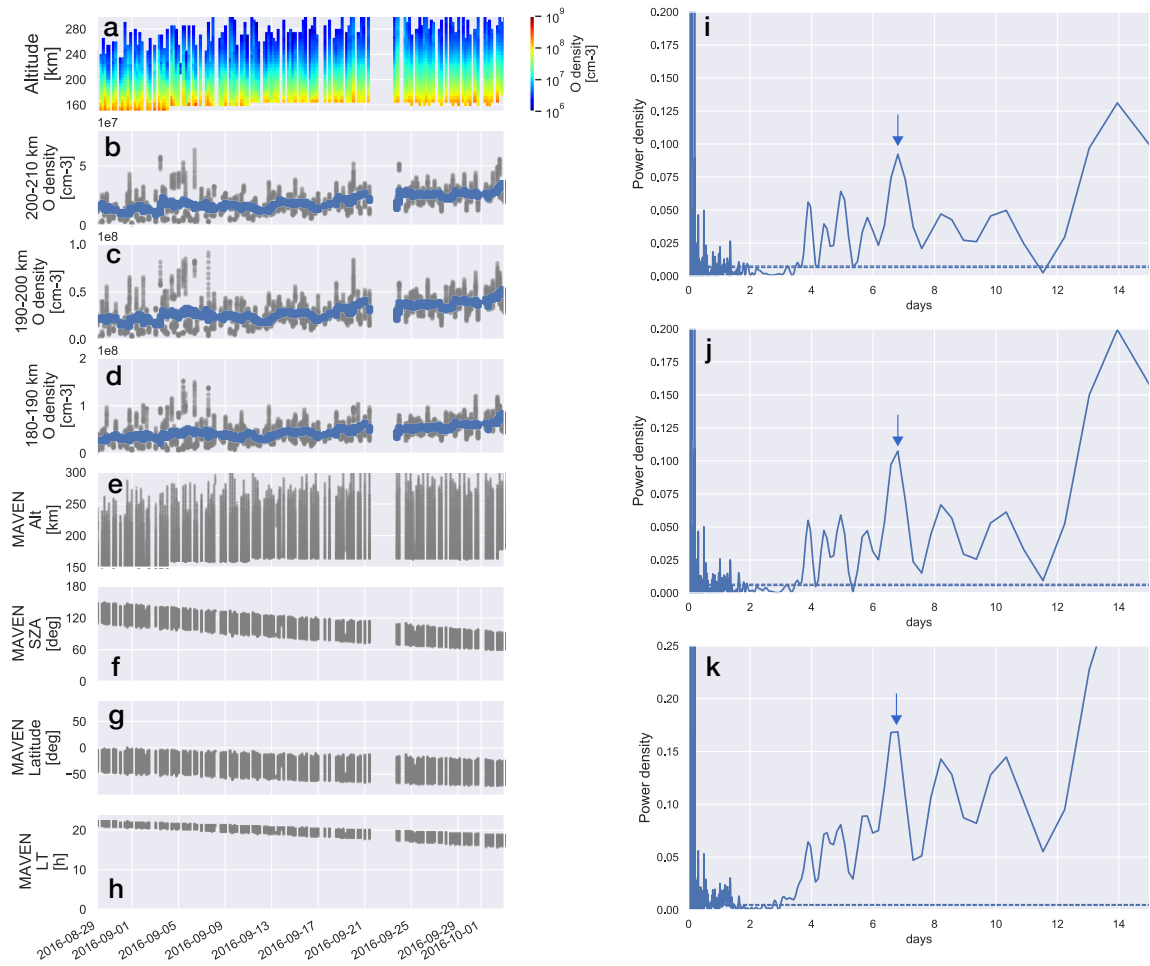

45

46 **Supplementary Fig. 3. Neutral Gas and Ion Mass Spectrometer (NGIMS) measurements,**  
 47 **its observation geometry, and periodogram result.**

48 (a-h) NGIMS measurements of O number density in the 150–300 km altitude range and density  
 49 variations at 200–210 km, 190–200 km, and 180–190 km altitudes are shown along with  
 50 MAVEN geometric information. Grey dots represent original data, and blue dots are running  
 51 average values using 1-day window. (i-k) Power spectra of O densities calculated using the  
 52 periodogram method. Horizontal dashed lines show the 99 % confidence level and the blue  
 53 arrows indicate the detected 6.8-day periodicity.

54

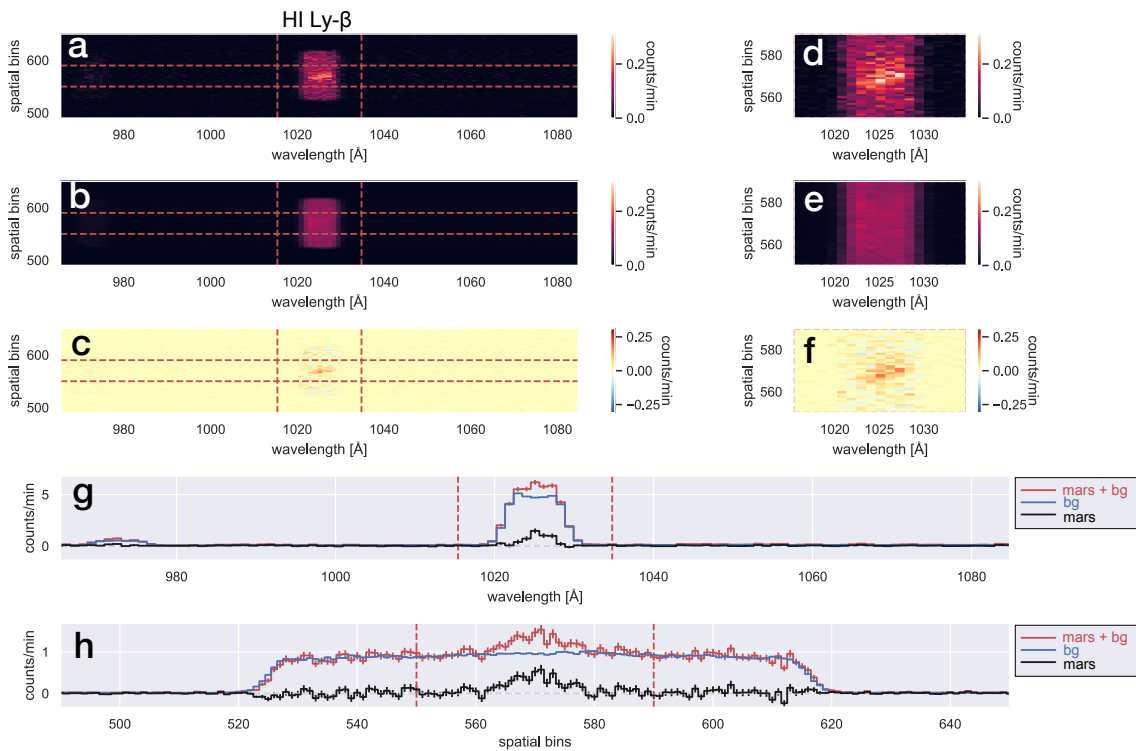

55

56 **Supplementary Fig. 4. HI Ly- $\beta$  airglow observed by Hisaki.**

57 Average spectra of Ly- $\beta$  for (a) on-Mars, (b) off-Mars (background), and (c) their residual  
 58 observed on September 4, 2016. Zoom-in features are shown in panels (d), (e), and (f),  
 59 respectively. Their spectral and spatial distributions are shown in panels (g) and (h).

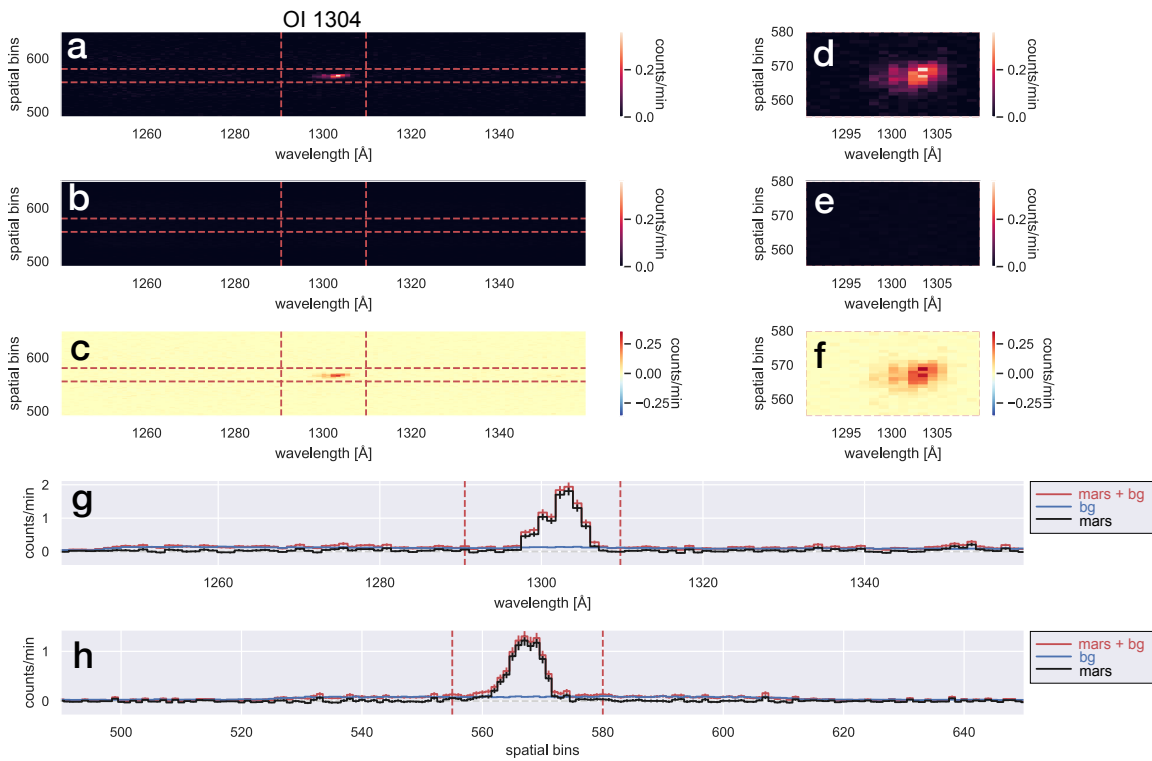

60

61 **Supplementary Fig. 5. OI 1304 Å airglow observed by Hisaki.**

62 Average spectra of OI 1304 Å observed on September 4, 2016 in the same format as

63 Supplementary Fig. 4.

64

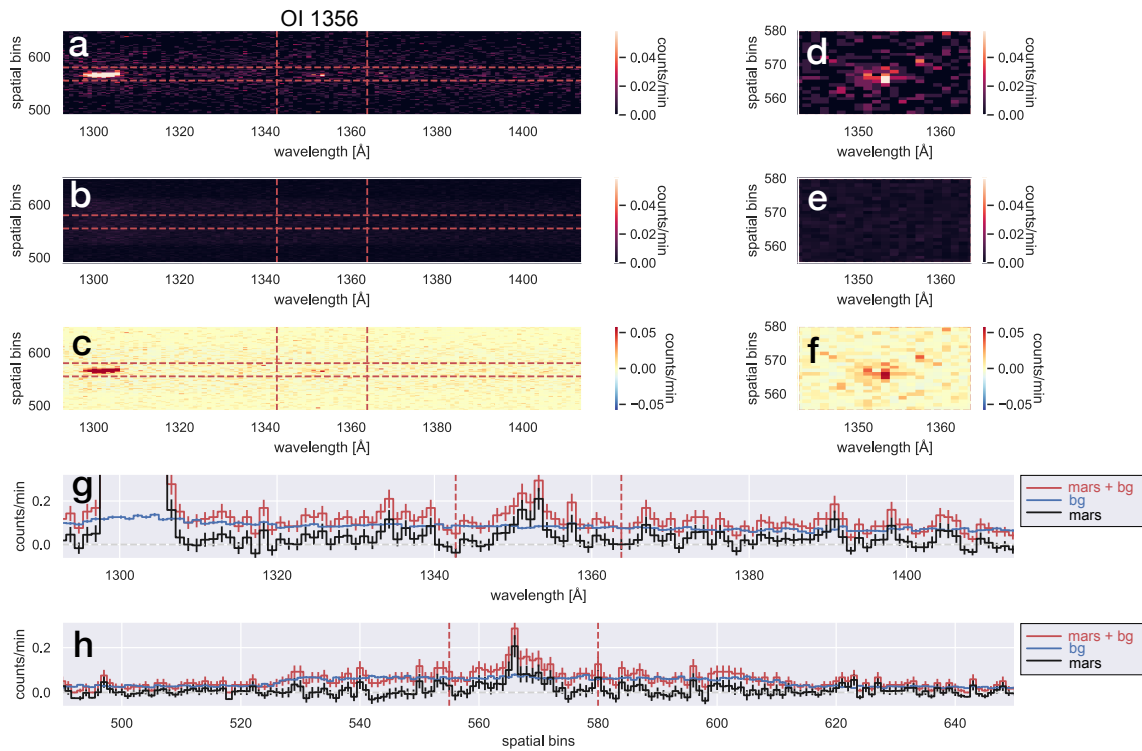

65

66 **Supplementary Fig. 6. OI 1356 Å airglow observed by Hisaki.**

67 Average spectra of OI 1356 Å observed on September 4, 2016 in the same format as

68 Supplementary Fig. 4.

69

70

71

72

73

74

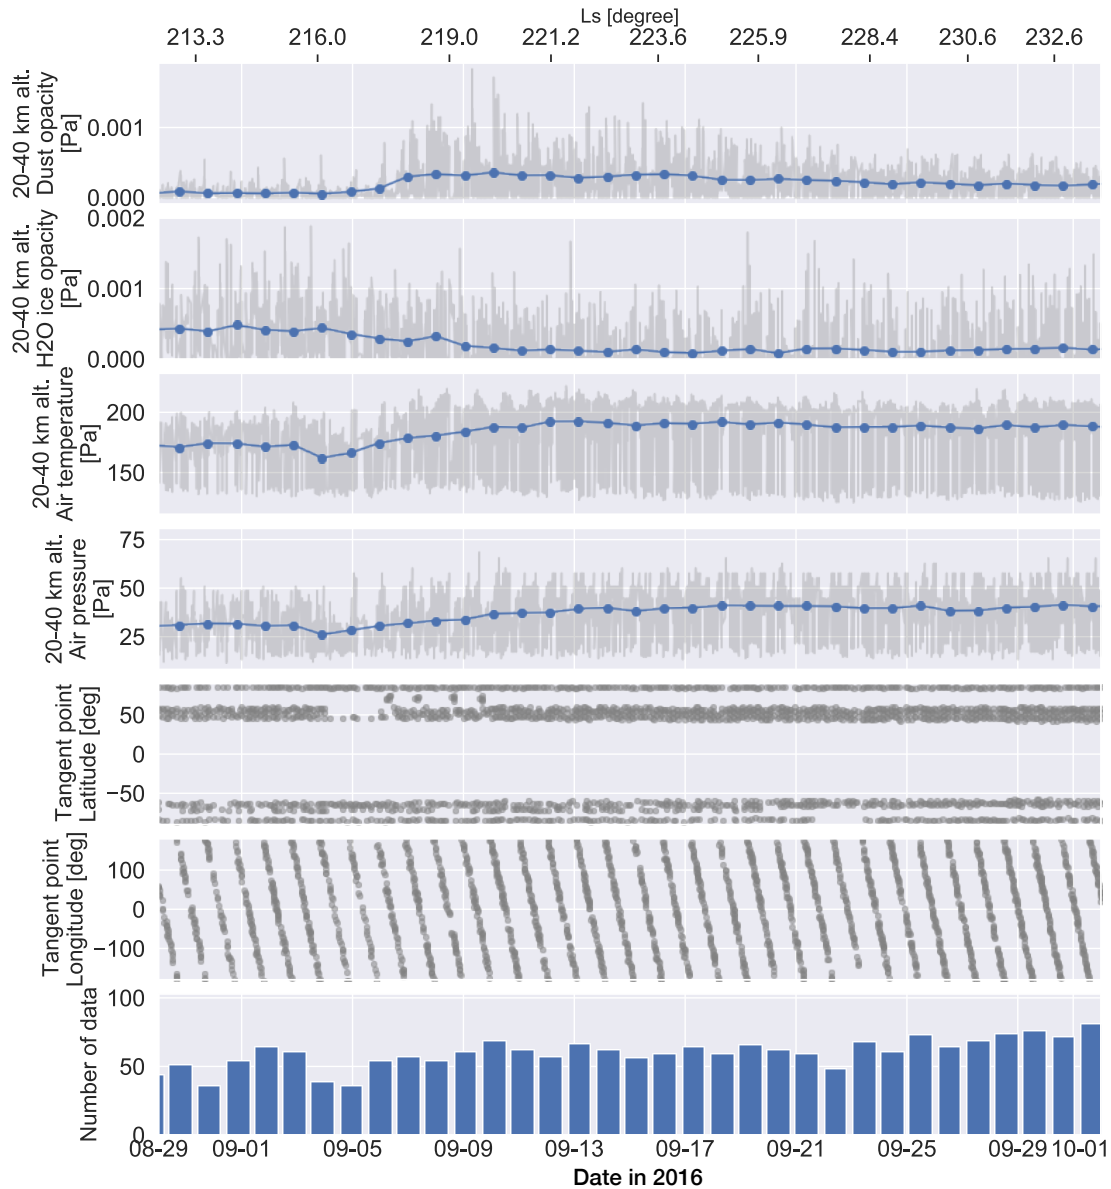

75

76 **Supplementary Fig. 7. Mars Climate Sounder (MCS) measurements and its observation**  
 77 **geometry.**

78 The top four panels show MCS measurements of dust opacity, H<sub>2</sub>O ice opacity, air temperature,  
 79 and air pressure observed at an altitude of 20–40 km at a local time of 11–13 h (gray lines). The

80 blue dots denote the average values of every Martian day, as shown in Figs. 1 and 2. Observation

81 latitude, longitude, and the number of data points per Martian day are also shown.
